# Supplementary material
Source: PubMed Central journal article supplement (PMC7605751)
Supplement: mmc2.pdf [file mmc2.pdf]

**House hold (Herd Questionnaire)** [To be completed once per site]

**CROSS SECTIONAL SURVEILLANCE FOR MERS CoV**

1. Name of interviewer (First and last name): \_\_\_\_\_
2. Date of interview: \_\_\_\_\_
3. Site Name: \_\_\_\_\_
4. GPS coordinates (read from the smart phone):
  - a. Eastings \_\_\_\_\_
  - b. Northings \_\_\_\_\_
5. Primary Administrative (County Name): Marsabit
6. County code: 010
7. Sub-county name:
  - a. Laisamis
  - b. NorthHorr
  - c. Moyale
8. Sub-location/Village: \_\_\_\_\_
9. Site Contact Person:
  - a. Name: \_\_\_\_\_
  - b. Function/role: \_\_\_\_\_
  - c. phone number (free text) \_\_\_\_\_
10. Site type (select one):
  - Primary production
  - Abattoir
  - Market
  - Quarantine station
  - Holding ground
  - Feedlot/fattening
  - Other (Specify): \_\_\_\_\_

If site type is primary production, then:

11. Type of primary production site (select one):

- Grazing area
- Watering point
- Ranch
- Farm

Other (Specify): \_\_\_\_\_

12. How many camels are on site? (free number) \_\_\_\_\_

13. Management system:

- Intensive
- Extensive
- Semi-intensive

14. Production system:

- Pastoral
- Agro-pastoral
- Mixed crop-livestock

15. Is there a perimeter fence around the site? (Observe)

- Yes
- No
- Other (specify) \_\_\_\_\_

16. Do your camels interact (grazing together, drinking water together etc.) with camels from other pastoralists or from other ranches?

- Yes
- No

17. How frequent is this interaction/contact?

- Daily
- Dry seasons
- Wet seasons
- During routine vaccinations or medical camps
- Other (specify) \_\_\_\_\_

18. What are primary camel use(s) (select all that apply):

- |                |                   |
|----------------|-------------------|
| Meat           | Prestige          |
| Milk           | Draft             |
| Transport/pack | Breeding          |
| Racing         | Cash/income       |
|                | None of the above |

19. Species other than camels present on site (select all that apply):

- Sheep
- Goats
- Poultry
- Pigs
- Dogs
- Cats
- Horses
- Cattle
- Donkeys

20. Watering: Where do your camels drink water from? (tick the **most** common source)

- Always from a private source (on farm/ ranch)
- Always from shared communal source
- Sometimes from either of the two
- Other (specify) \_\_\_\_\_

21. How are your camels mainly confined at night?

- Confined separately from the other species
- Kept together with other species
- Other (specify) \_\_\_\_\_

22. Which wild animal species are present in the vicinity of your livestock? Select all that apply

- None
- Bats
- Primates (e.g. monkeys)
- Wild pigs
- Warthogs
- Wilder beast
- Giraffe
- Rats and other rodents
- Antelopes/ gazelles
- Zebras
- Wild birds
- Wild carnivores

Other (specify): \_\_\_\_\_

23. Any other relevant information to note on the site?

---

---

---

**VALUE CHAIN MODULE (to be filled ONCE per SITE)**

1. What vaccines have been administered to your camels in the past one year (type, please describe):

\_\_\_\_\_

2. What deworming treatments have been administered to camels in the past one year, and how often (type, please describe): \_\_\_\_\_

3. What Ecto-parasite treatment have been given to camels during the last one year? (type, please describe): \_\_\_\_\_

4. What other treatments have been given to the camel herd during the last one year (type, please describe): \_\_\_\_\_

5. Which are the main breeding months for your camels?

- There is no specific breeding season
- January
- February
- March
- April
- May
- June
- July
- August
- September
- October
- November
- December

6. Approximately how many camels are born in your herd per year?

7. Where do you mainly source or buy your camels from?

All born in the farm

From markets within

From neighborhoods

From markets or areas outside the county

Sourced through traders

Don't know

Other (specify) \_\_\_\_\_

8. Approximately how many new camels (not including born) enter your herd (buying, gifts, etc) per year?

< 5

5 – 10

10 – 20

> 20 camels

9. How old are they when they are purchased or when they join your herd?

<1 year

1-2 years

>2 years

10. Approximately how many camels leave your herd (selling, gifts etc.) per year?

< 5

5 – 10

10 – 20

> 20 camels

11. How old are camels when they leave your herd or when they are sold?

<1 year

1-2 years

>2 years

12. Where are the camels mainly sold to?

No camels sales

To the markets within the county

To the neighborhoods

To markets or other areas outside the county

Sold through traders

Other (specify) \_\_\_\_\_

13. What period(s) of the year are camels **most** sold/ leave the herd? (Select months):

Any time of the year

January

February

March

April

May

June

July

August

September

October

November

December

14. **Picture of the site**
